# Supplementary material for: Lithium-7 qNMR as a method to quantify lithium content in brines using benchtop NMR
Source: Royal Society of Chemistry journal article supplement (doi:10.1039/d0an02088e), 2020-11-19

## Supporting Information

for

### **Lithium-7 qNMR as a Method to Quantify Lithium Content in Brine Pools Using Benchtop NMR**

Juan F. Araneda,\* Paul Hui, Garrett M. Leskowitz, Susanne D. Riegel, Rodrigo Mercado, and  
Christopher Green

## Table of Contents

|                                                                                                                                                            |   |
|------------------------------------------------------------------------------------------------------------------------------------------------------------|---|
| <b>Table S1.</b> $T_1$ values for several lithium samples prepared in the lab and samples from brine pools. LiCl solutions are reported in w/w% LiCl ..... | 3 |
| <b>Table S2.</b> Intra- and inter-day precision experiments.....                                                                                           | 3 |
| <b>Table S3.</b> Precision and bias by NMR using certified 1000ppm standard for ICP (1002 +/- 8 mg/L).....                                                 | 3 |
| <b>Table S4.</b> Calibration curves.....                                                                                                                   | 4 |
| <b>Table S5.</b> Residual output calibration curves.....                                                                                                   | 5 |
| Regression analysis comparing results from NMR and AA.....                                                                                                 | 6 |

**Table S1.**  $T_1$  values for several lithium samples prepared in the lab and samples from brine pools. LiCl solutions are reported in w/w% LiCl.

| Sample   | $T_1$ time (s) |
|----------|----------------|
| 0.25%    | 23.25          |
| 0.50%    | 23.59          |
| 1.00%    | 22.64          |
| 3.00%    | 22.03          |
| 7.50%    | 19.25          |
| 15.00%   | 12.17          |
| 30.00%   | 3.66           |
| <b>4</b> | 12.86          |
| <b>2</b> | 13.91          |
| <b>3</b> | 14.63          |
| <b>6</b> | 0.013          |

**Table S2.** Intra- and inter-day precision experiments.

|      | Integral1 | Integral2 | Integral3 | STDV | RSD  |
|------|-----------|-----------|-----------|------|------|
| Day1 | 3198.51   | 3196.14   | 3181.02   | 9.49 | 0.30 |
| Day2 | 3233.31   | 3240.22   | 3227.74   | 6.25 | 0.19 |
| Day3 | 3212.55   | 3222.06   | 3209.39   | 6.59 | 0.21 |
| Day4 | 3184.47   | 3183.9    | 3186.25   | 1.23 | 0.04 |
| Day5 | 3216.91   | 3215.37   | 3215.03   | 1.00 | 0.03 |
| Day6 | 3182.89   | 3174.18   | 3178.15   | 4.36 | 0.14 |

**Table S3.** Precision and bias by NMR using certified 1000ppm standard for ICP (1002 +/- 8 mg/L)

| Run | Results (mg/L) | Difference (-1002) | Squared difference |
|-----|----------------|--------------------|--------------------|
| 1   | 1033.410       | 31.410             | 986.603            |
| 2   | 1019.944       | 17.944             | 321.994            |
| 3   | 985.563        | -16.437            | 270.182            |
| 4   | 1009.312       | 7.312              | 53.460             |
| 5   | 981.230        | -20.770            | 431.403            |
| 6   | 999.559        | -2.441             | 5.958              |
| 7   | 978.673        | -23.327            | 544.126            |
| 8   | 1008.934       | 6.934              | 48.080             |
| 9   | 1012.158       | 10.158             | 103.188            |
| 10  | 981.090        | -20.910            | 437.218            |
|     |                |                    |                    |
|     | sum            | -10.127            | 3202.211           |
|     | bias           | -1.013             |                    |
|     | precision      |                    | 18.863             |

**Table S4.** Calibration curves

| % Li | % LiCl | Integration 1 | Integration 2 | Integration 3 | Avg. Integration | sd     | rsd  |
|------|--------|---------------|---------------|---------------|------------------|--------|------|
| 4.92 | 30     | 6011.89       | 6033.01       | 6044.9        | 6029.93          | 16.719 | 0.28 |
| 2.46 | 15     | 3154.84       | 3157.7        | 3151.94       | 3154.83          | 2.880  | 0.09 |
| 1.23 | 7.5    | 1620.28       | 1613.49       | 1600.12       | 1611.30          | 10.257 | 0.64 |
| 0.49 | 3      | 630.621       | 630.509       | 631.882       | 631.00           | 0.762  | 0.12 |
| 0.16 | 1      | 200.774       | 204.052       | 199.812       | 201.55           | 2.223  | 1.10 |
| 0.08 | 0.5    | 98.8305       | 101.767       | 98.0829       | 99.56            | 1.947  | 1.96 |
| 0.04 | 0.25   | 49.427        | 49.4711       | 48.6729       | 49.19            | 0.449  | 0.91 |

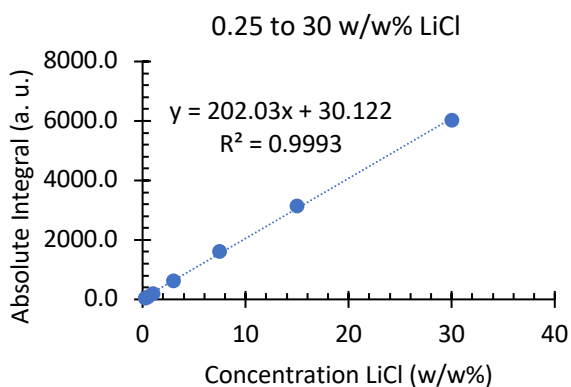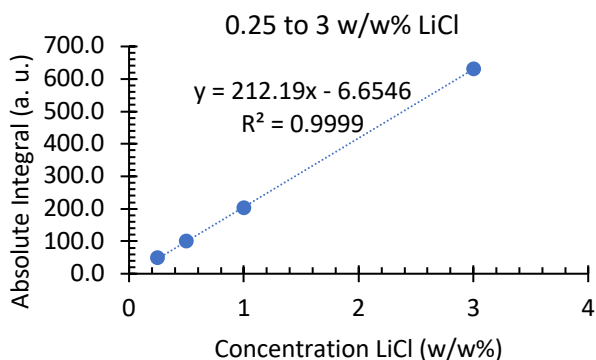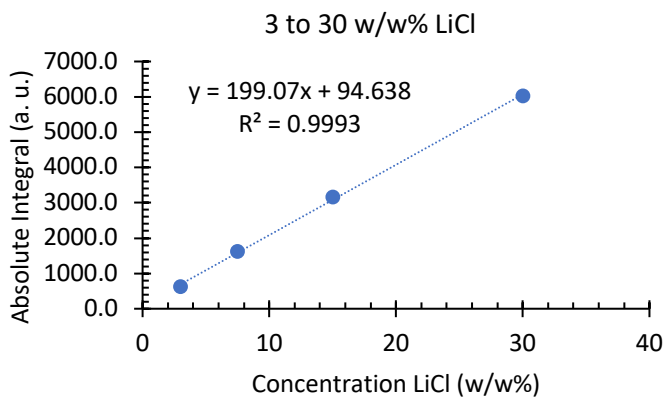

**Table S5.** Residual output calibration curves

**RESIDUAL OUTPUT (0.25-30  
w/w% LiCl)**

| <i>Observation</i> | <i>Predicted Avg.<br/>Integration</i> | <i>Residuals</i> |
|--------------------|---------------------------------------|------------------|
| 1                  | 6091.170                              | -61.237          |
| 2                  | 3060.646                              | 94.180           |
| 3                  | 1545.384                              | 65.912           |
| 4                  | 636.227                               | -5.223           |
| 5                  | 232.157                               | -30.611          |
| 6                  | 131.140                               | -31.580          |
| 7                  | 80.631                                | -31.441          |

**RESIDUAL OUTPUT (0.25-3  
w/w% LiCl)**

| <i>Observation</i> | <i>Predicted Avg.<br/>Integration</i> | <i>Residuals</i> |
|--------------------|---------------------------------------|------------------|
| 1                  | 629.926                               | 1.078            |
| 2                  | 205.539                               | -3.993           |
| 3                  | 99.442                                | 0.118            |
| 4                  | 46.394                                | 2.797            |

**RESIDUAL OUTPUT (3-30  
w/w% LiCl)**

| <i>Observation</i> | <i>Predicted Avg.<br/>Integration</i> | <i>Residuals</i> |
|--------------------|---------------------------------------|------------------|
| 1                  | 6066.805                              | -36.872          |
| 2                  | 3080.721                              | 74.105           |
| 3                  | 1587.680                              | 23.617           |
| 4                  | 691.854                               | -60.850          |

## Regression analysis comparing results from NMR and AA

The intercept obtained is 0.0065 ( $b_0$ ) and the slope of the graph is 1.0405 ( $b_1$ ). Both values were obtained within the 95% confidence interval. The interval for the intercept is -0.0236 and 0.0366, and it was obtained using the following expression:

$$b_0 \pm t_{\alpha/2} \frac{s}{\sqrt{n \sum_{i=1}^n (x - \bar{x})^2}} \sqrt{\sum_{i=1}^n x_i^2}$$

Where  $t_{\alpha/2}$  is the critical value tabulated to obtain the 95% confidence with 14 degrees of freedom and  $s$  is the standard error. The interval of the slope is 1.029 and 1.052 and it was calculated using the following expression:

$$b_1 \pm t_{\alpha/2} s / \sqrt{\sum_{i=1}^n (x - \bar{x})^2}$$

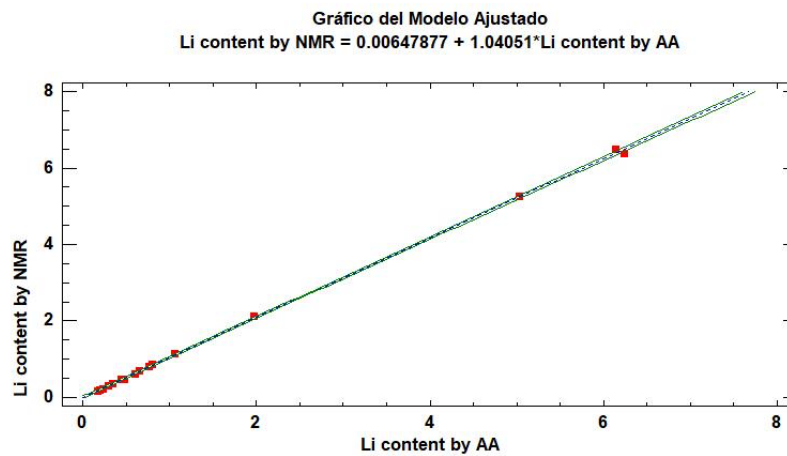

Supplement: d0an02088e1.pdf [file d0an02088e1.pdf]
